# Supplementary figures and images for: Transcriptomic Analysis of Drug-Resistance Acinetobacter baumannii under the Stress Condition Caused by Litsea cubeba L. Essential Oil via RNA Sequencing
Source: MDPI journal article supplement (doi:10.3390/genes12071003), 2021-06-29

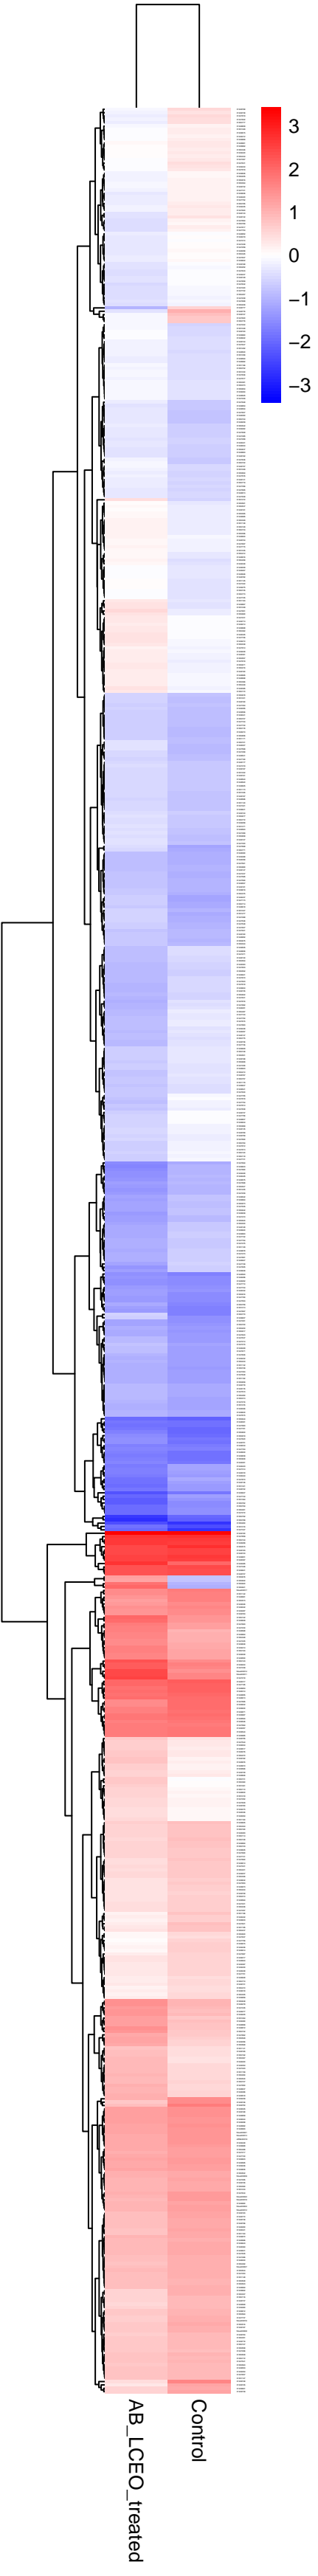

Supplement: s1 [file s1]
